# Supplementary material for: Analysis of Transcription Factor-Related Regulatory Networks Based on Bioinformatics Analysis and Validation in Hepatocellular Carcinoma
Source: Hindawi journal article supplement (doi:10.1155/2018/1431396), 2018-08-29

**Clinicopathological characteristics of 20 HCC patients**

| Case | Age | Gender | Pathological Diagnosis<br>(Differentiation Status)              | HBsAg | HbeAg | HCVAbs | Tumor<br>Size(cm) | Vascular<br>Invasion | Neural<br>Invasion | Immunocytochemistry |              |       |             |                               |            |
|------|-----|--------|-----------------------------------------------------------------|-------|-------|--------|-------------------|----------------------|--------------------|---------------------|--------------|-------|-------------|-------------------------------|------------|
|      |     |        |                                                                 |       |       |        |                   |                      |                    | Ki67                | CK7          | GPC-3 | AFP         | CK19                          | Hepatocyte |
| 1    | 45  | male   | poorly differentiated<br>hepatocellular carcinoma               | +     | +     | -      | 5.8×5×4           | -                    | -                  | 30%+                | -            | +     | +           | ?                             | -          |
| 2    | 37  | male   | poorly differentiated<br>hepatocellular carcinoma               | +     | -     | -      | 10×7×5.5          | -                    | -                  | 30%+                | -            | +     | +           | ?                             | +          |
| 3    | 52  | male   | moderately differentiated<br>hepatocellular carcinoma           | +     | +     | -      | 8×6×6             | +                    | -                  | 10%+                | Focal<br>+   | -     | -           | -                             | +          |
| 4    | 43  | male   | moderately differentiated<br>hepatocellular carcinoma           | +     | -     | -      | 3×3×2.8           | -                    | -                  | 10%+                | Partial<br>+ | +     | Focal<br>+  | Partial<br>+                  | +          |
| 5    | 52  | female | moderately/poorly<br>differentiated hepatocellular<br>carcinoma | +     | +     | -      | -                 | -                    | -                  | Focal<br>5%+        | -            | +     | Weakly<br>+ | Small<br>focal<br>weakly<br>+ | +          |
| 6    | 62  | female | moderately differentiated<br>hepatocellular carcinoma           | -     | -     | +      | 4.5×4×3.5         | -                    | -                  | 10%+                | -            | -     | -           | ?                             | +          |
| 7    | 43  | male   | moderately/poorly<br>differentiated hepatocellular<br>carcinoma | +     | +     | -      | 9×8×6             | -                    | -                  | 20%+                | -            | +     | +           | Focal<br>+                    | -          |
| 8    | 53  | male   | moderately differentiated<br>hepatocellular carcinoma           | -     | -     | +      | 5.5×5×3           | -                    | -                  | 5%+                 | Focal<br>+   | -     | -           | -                             | +          |
| 9    | 65  | female | moderately differentiated<br>hepatocellular carcinoma           | -     | -     | +      | 6×5×5cm           | -                    | -                  | 5%+                 | -            | -     | -           | ?                             | +          |
| 10   | 39  | female | moderately/poorly                                               | -     | -     | -      | 4×4×3.5           | -                    | -                  | Focal               | Small        | +     | +           | Small                         | +          |

|    |    |        |                                                           |   |   |   |              |   |   |            |         |           |                |              |           |
|----|----|--------|-----------------------------------------------------------|---|---|---|--------------|---|---|------------|---------|-----------|----------------|--------------|-----------|
|    |    |        | differentiated hepatocellular carcinoma with necrosis     |   |   |   |              |   |   | 20%+       | focal + |           |                | focal weakly |           |
| 11 | 62 | male   | high/moderately differentiated hepatocellular carcinoma   | + | - | - | 4×3×2        | - | - | Focal 10%+ | -       | -         | -              | +            |           |
| 12 | 54 | male   | moderately differentiated hepatocellular carcinoma        | - | - | + | -            | - | - | 10%+       | +       | ?         | -              | -            | +         |
| 13 | 52 | male   | poorly differentiated hepatocellular carcinoma            | - | - | - | Diameter 2.0 | + | - | 20%+       | -       | +         | -              | ?            | +         |
| 14 | 16 | female | high/moderately differentiated hepatocellular carcinoma   | + | - | - | 9×6×5.8      | + | - | 30%+       | -       | Partial + | Partial weakly | -            | Partial + |
| 15 | 35 | male   | moderately differentiated hepatocellular carcinoma        | + | - | - | 8×7×6        | - | - | 20%+       | -       | -         | -              | ?            | -         |
| 16 | 40 | male   | moderately differentiated hepatocellular carcinoma        | + | - | - | 9×7×5.5      | + | - | 20%+       | -       | +         | -              | -            | +         |
| 17 | 49 | male   | moderately/poorly differentiated hepatocellular carcinoma | + | - | - | 9×8×6        | + | - | 10%+       | -       | +         | -              | -            | Focal +   |
| 18 | 48 | male   | moderately differentiated hepatocellular carcinoma        | + | - | - | 13×8×7       | - | - | 30%+       | -       | -         | -              | -            | -         |
| 19 | 52 | male   | poorly differentiated hepatocellular carcinoma            | + | + | - | -            | - | - | Focal 5%+  | -       | +         | ?              | ?            | +         |
| 20 | 65 | male   | poorly differentiated hepatocellular carcinoma            | + | + | - | -            | + | - | Focal 20%+ | ?       | +         | ?              | -            | +         |

Note: “?” represented for lack of relevant results; “+” represented positive results; “-” represented negative results.

Table S2 62 regulation modes formed by 42 differential genes in TF-gene regulatory network

| # TF  | Target  | Type       | Reference | # TF  | Target  | Type       | Reference<br>(Pubmed ID) |
|-------|---------|------------|-----------|-------|---------|------------|--------------------------|
| BRCA1 | ASPM    | Activation | 16123590  | SP1   | RGN     | Repression | 21526343                 |
| BRCA1 | CCNB1   | Unknown    | 12647291  | SP1   | ADH6    | Unknown    | 12004059                 |
| BRCA1 | EGR1    | Unknown    | 20103632  | SP1   | ASPN    | Unknown    | 21528154                 |
| BRCA1 | FOS     | Unknown    | 11313879  | SP1   | IGFBP1  | Unknown    | 2849945                  |
| BRCA1 | IGF1    | Repression | 18045956  | SP1   | FOXO1   | Activation | 20372080                 |
| EGR1  | CYP2B6  | Activation | 18303024  | SP1   | PTTG1   | Activation | 18339849                 |
| FOS   | FOS     | Repression | 2498646   | SP1   | CCNA2   | Repression | 18368381                 |
| FOS   | CYP1A2  | Unknown    | 12135113  | SP1   | SPP1    | Unknown    | 11126367                 |
| NFKB1 | PGLYRP2 | Unknown    | 16714290  | SP1   | HSD17B2 | Activation | 16807381;18270252        |
| NFKB1 | EGR1    | Repression | 21983014  | SP1   | HSD17B2 | Repression | 18270252                 |
| NFKB1 | FBP1    | Unknown    | 11023824  | STAT6 | FOSB    | Unknown    | 18342537                 |
| NFKB1 | CXCL12  | Activation | 17530707  | STAT6 | FOS     | Activation | 11922943                 |
| NFKB1 | CCL19   | Activation | 20953353  | TP53  | CCNA2   | Unknown    | 8270002                  |
| NFKB1 | F8      | Unknown    | 10959692  | TP53  | CCNB1   | Repression | 11892838                 |
| NFKB1 | CD69    | Unknown    | 10480634  | TP53  | CCNB2   | Repression | 12889596                 |
| NFKB1 | BGN     | Activation | 15536164  | TP53  | CHEK1   | Repression | 15016801                 |
| NFKB1 | CCNB1   | Activation | 11861406  | TP53  | EGR1    | Unknown    | 16990849                 |
| SP1   | CXCL14  | Activation | 22382027  | TP53  | FOXO1   | Repression | 21518729                 |
| SP1   | ADRA1A  | Unknown    | 10520459  | TP53  | ID1     | Unknown    | 16557594                 |
| SP1   | CYP3A4  | Unknown    | 15100175  | TP53  | IGFBP3  | Activation | 10101800                 |
| SP1   | FOS     | Unknown    | 9528985   | TP53  | MKI67   | Unknown    | 14675138                 |
| SP1   | PGLYRP2 | Unknown    | 16714290  | TP53  | PRC1    | Repression | 12889596                 |
| SP1   | CETP    | Repression | 10669650  | TP53  | THBS1   | Activation | 10029407;10101800        |

|     |        |            |          |      |        |            |                   |
|-----|--------|------------|----------|------|--------|------------|-------------------|
| SP1 | HGF    | Activation | 9223667  | TP53 | TP53I3 | Activation | 10101800;14695213 |
| SP1 | EGR1   | Activation | 8349585  | TP53 | TRIM22 | Activation | 15064739          |
| SP1 | PCK1   | Activation | 14744869 | TP53 | PTTG1  | Activation | 12355087          |
| SP1 | FBP1   | Unknown    | 11023824 | TP53 | PTTG1  | Repression | 15016801          |
| SP1 | CHST4  | Activation | 22446378 | EGR1 | TP53   | Activation | 9242687           |
| SP1 | ENG    | Activation | 21146604 | EGR1 | NFKB1  | Unknown    | 10671503          |
| SP1 | CD163  | Unknown    | 10725797 | FOS  | NFKB1  | Repression | 20188076          |
| SP1 | IGFBP3 | Activation | 12200149 | FOS  | TP53   | Unknown    | 10348347          |

Table S3 Prediction results of differentially expressed miRNA targets in HCC by miRTarbase

| miRNA           | Target | miRNA           | Target | miRNA            | Target | miRNA          | Target |
|-----------------|--------|-----------------|--------|------------------|--------|----------------|--------|
| hsa-miR-26a-5p  | HGF    | hsa-miR-194-5p  | FOXO1  | hsa-miR-4707-5p  | CYP2B6 | hsa-miR-17-5p  | THBS1  |
| hsa-miR-16-5p   | HGF    | hsa-miR-24-1-5p | FOXO1  | hsa-miR-587      | CYP2B6 | hsa-miR-20a-5p | THBS1  |
| hsa-miR-26b-5p  | HGF    | hsa-miR-320a    | FOXO1  | hsa-miR-26a-5p   | PCK1   | hsa-miR-92a-3p | THBS1  |
| hsa-miR-200a-3p | HGF    | hsa-miR-23a-3p  | FOXO1  | hsa-miR-26b-5p   | PCK1   | hsa-miR-155-5p | THBS1  |
| hsa-let-7b-5p   | CYP1A2 | hsa-miR-204-5p  | FOXO1  | hsa-miR-1277-5p  | PCK1   | hsa-miR-30a-5p | THBS1  |
| hsa-miR-196a-3p | CYP1A2 | hsa-miR-630     | FOXO1  | hsa-miR-330-3p   | PCK1   | hsa-miR-21-5p  | THBS1  |
| hsa-miR-4252    | CYP1A2 | hsa-miR-423-5p  | PTTG1  | hsa-miR-3163     | PCK1   | hsa-miR-19a-3p | THBS1  |
| hsa-miR-484     | ADRA1A | hsa-miR-320a    | PTTG1  | hsa-miR-5582-3p  | PCK1   | hsa-miR-18a-5p | THBS1  |
| hsa-miR-27b-3p  | CYP3A4 | hsa-miR-186-5p  | PTTG1  | hsa-miR-548ar-3p | PCK1   | hsa-let-7d-5p  | THBS1  |

---

|                 |         |                 |       |                  |      |                 |       |
|-----------------|---------|-----------------|-------|------------------|------|-----------------|-------|
| hsa-miR-26b-5p  | HSD17B2 | hsa-miR-26a-5p  | PTTG1 | hsa-let-7f-2-3p  | PCK1 | hsa-let-7g-5p   | THBS1 |
| hsa-miR-4311    | BGN     | hsa-miR-17-5p   | PTTG1 | hsa-miR-26a-1-3p | PCK1 | hsa-miR-27b-3p  | THBS1 |
| hsa-miR-26b-5p  | ASPN    | hsa-let-7b-5p   | PTTG1 | hsa-miR-1297     | PCK1 | hsa-miR-4528    | THBS1 |
| hsa-miR-29c-3p  | IGFBP1  | hsa-miR-146a-3p | PTTG1 | hsa-miR-26a-5p   | IGF1 | hsa-miR-4302    | THBS1 |
| hsa-miR-1277-5p | IGFBP1  | hsa-miR-26a-5p  | CHEK1 | hsa-miR-26b-5p   | IGF1 | hsa-miR-5680    | THBS1 |
| hsa-miR-625-3p  | IGFBP1  | hsa-miR-16-5p   | CHEK1 | hsa-miR-24-3p    | IGF1 | hsa-miR-19b-3p  | THBS1 |
| hsa-let-7b-5p   | CCNB1   | hsa-miR-4252    | CHEK1 | hsa-miR-1277-5p  | IGF1 | hsa-miR-4450    | THBS1 |
| hsa-miR-212-3p  | CCNB1   | hsa-miR-24-3p   | CHEK1 | hsa-miR-505-3p   | IGF1 | hsa-miR-1205    | THBS1 |
| hsa-miR-24-3p   | CCNB1   | hsa-miR-92a-3p  | CHEK1 | hsa-miR-29a-3p   | IGF1 | hsa-miR-211-3p  | THBS1 |
| hsa-miR-92a-3p  | CCNB1   | hsa-miR-505-3p  | CHEK1 | hsa-miR-455-3p   | IGF1 | hsa-miR-4756-5p | THBS1 |
| hsa-miR-20a-5p  | CCNB1   | hsa-miR-193b-3p | CHEK1 | hsa-miR-377-5p   | IGF1 | hsa-miR-1321    | THBS1 |
| hsa-miR-559     | CCNB1   | hsa-miR-424-5p  | CHEK1 | hsa-miR-27a-3p   | IGF1 | hsa-miR-3163    | THBS1 |
| hsa-miR-548b-5p | CCNB1   | hsa-miR-99b-5p  | CHEK1 | hsa-let-7i-5p    | IGF1 | hsa-miR-3149    | THBS1 |
| hsa-miR-548d-5p | CCNB1   | hsa-miR-15b-5p  | CHEK1 | hsa-miR-539-5p   | IGF1 | hsa-miR-5003-5p | THBS1 |
| hsa-miR-548n    | CCNB1   | hsa-miR-19a-3p  | CHEK1 | hsa-miR-665      | IGF1 | hsa-miR-3065-5p | THBS1 |

---

---

|                 |        |                 |       |                 |        |                 |       |
|-----------------|--------|-----------------|-------|-----------------|--------|-----------------|-------|
| hsa-miR-548h-5p | CCNB1  | hsa-miR-19b-3p  | CHEK1 | hsa-miR-1305    | IGF1   | hsa-let-7f-5p   | THBS1 |
| hsa-miR-548i    | CCNB1  | hsa-miR-466     | CHEK1 | hsa-miR-421     | IGF1   | hsa-miR-4458    | THBS1 |
| hsa-miR-548w    | CCNB1  | hsa-miR-4672    | CHEK1 | hsa-miR-3065-5p | IGF1   | hsa-let-7i-5p   | THBS1 |
| hsa-miR-548ab   | CCNB1  | hsa-miR-15a-5p  | CHEK1 | hsa-miR-30b-3p  | IGF1   | hsa-miR-4500    | THBS1 |
| hsa-miR-26b-5p  | TP53I3 | hsa-miR-4733-3p | CHEK1 | hsa-miR-4284    | IGF1   | hsa-miR-455-3p  | THBS1 |
| hsa-miR-505-3p  | PRC1   | hsa-miR-4731-3p | CHEK1 | hsa-miR-214-5p  | IGF1   | hsa-miR-650     | THBS1 |
| hsa-miR-125a-5p | PRC1   | hsa-miR-362-3p  | CHEK1 | hsa-miR-4478    | IGF1   | hsa-miR-377-5p  | THBS1 |
| hsa-miR-2277-3p | PRC1   | hsa-miR-620     | CHEK1 | hsa-miR-4419b   | IGF1   | hsa-miR-1827    | THBS1 |
| hsa-miR-302c-3p | PRC1   | hsa-miR-1270    | CHEK1 | hsa-miR-574-5p  | IGF1   | hsa-miR-4537    | THBS1 |
| hsa-miR-92a-3p  | PRC1   | hsa-miR-4531    | CHEK1 | hsa-miR-18b-5p  | IGF1   | hsa-miR-4257    | THBS1 |
| hsa-miR-16-5p   | MKI67  | hsa-miR-197-3p  | CHEK1 | hsa-miR-28-5p   | IGF1   | hsa-miR-320c    | THBS1 |
| hsa-miR-484     | MKI67  | hsa-miR-23b-3p  | CCNB2 | hsa-miR-23a-3p  | CXCL12 | hsa-miR-192-5p  | EGR1  |
| hsa-miR-559     | MKI67  | hsa-let-7f-5p   | CCNB2 | hsa-miR-126-5p  | CXCL12 | hsa-miR-191-5p  | EGR1  |
| hsa-miR-548b-5p | MKI67  | hsa-let-7b-5p   | CCNB2 | hsa-miR-126-3p  | CXCL12 | hsa-miR-377-3p  | EGR1  |
| hsa-miR-548d-5p | MKI67  | hsa-let-7a-5p   | CCNB2 | hsa-miR-146a-5p | CXCL12 | hsa-miR-181a-5p | EGR1  |

---

---

|                 |       |                 |       |                 |        |                  |     |
|-----------------|-------|-----------------|-------|-----------------|--------|------------------|-----|
| hsa-miR-548h-5p | MKI67 | hsa-let-7b-5p   | CCNA2 | hsa-miR-1228-3p | CXCL12 | hsa-miR-19b-1-5p | FOS |
| hsa-miR-548i    | MKI67 | hsa-miR-29c-3p  | CCNA2 | hsa-miR-362-3p  | CXCL12 | hsa-miR-19b-1-5p | FOS |
| hsa-miR-548w    | MKI67 | hsa-miR-27b-3p  | CCNA2 | hsa-miR-221-3p  | CXCL12 | hsa-miR-4726-5p  | FOS |
| hsa-miR-548ab   | MKI67 | hsa-miR-212-3p  | CCNA2 | hsa-miR-454-3p  | CXCL12 | hsa-miR-3622b-5p | FOS |
| hsa-miR-505-3p  | MKI67 | hsa-miR-193b-3p | CCNA2 | hsa-miR-148b-3p | CCL19  | hsa-miR-7-5p     | FOS |
| hsa-miR-34a-5p  | MKI67 | hsa-miR-29b-3p  | CCNA2 | hsa-miR-9-5p    | CCL19  | hsa-miR-146a-5p  | FOS |
| hsa-miR-192-5p  | MKI67 | hsa-miR-24-3p   | CCNA2 | hsa-miR-26b-5p  | CHST4  | hsa-miR-34a-5p   | FOS |
| hsa-miR-877-3p  | MKI67 | hsa-miR-19a-3p  | CCNA2 | hsa-let-7b-5p   | ENG    | hsa-miR-449a     | FOS |
| hsa-miR-331-3p  | MKI67 | hsa-miR-197-3p  | CCNA2 | hsa-miR-1228-5p | ENG    | hsa-miR-101-5p   | FOS |
| hsa-miR-221-3p  | MKI67 | hsa-miR-145-5p  | CCNA2 | hsa-miR-3196    | ENG    | hsa-miR-101-3p   | FOS |
| hsa-miR-29b-3p  | MKI67 | hsa-miR-148a-3p | CCNA2 | hsa-miR-25-5p   | ENG    | hsa-miR-221-3p   | FOS |
| hsa-miR-17-5p   | MKI67 | hsa-miR-148b-3p | CCNA2 | hsa-miR-4781-5p | ENG    | hsa-miR-222-3p   | FOS |
| hsa-miR-218-5p  | MKI67 | hsa-miR-130a-3p | CCNA2 | hsa-miR-32-5p   | CD69   | hsa-miR-181a-5p  | FOS |
| hsa-miR-4763-5p | MKI67 | hsa-miR-3666    | CCNA2 | hsa-miR-92a-3p  | CD69   | hsa-miR-29b-3p   | FOS |
| hsa-miR-519e-3p | MKI67 | hsa-miR-454-3p  | CCNA2 | hsa-miR-17-5p   | IGFBP3 | hsa-miR-192-5p   | FOS |

---

---

|                 |       |                 |        |                 |        |                 |      |
|-----------------|-------|-----------------|--------|-----------------|--------|-----------------|------|
| hsa-miR-5587-5p | MKI67 | hsa-miR-301a-3p | CCNA2  | hsa-miR-146a-5p | TRIM22 | hsa-miR-155-5p  | FOS  |
| hsa-miR-92a-3p  | MKI67 | hsa-miR-29a-3p  | CCNA2  | hsa-miR-26b-5p  | TRIM22 | hsa-miR-181b-5p | FOS  |
| hsa-miR-193b-3p | ASPM  | hsa-miR-22-3p   | CCNA2  | hsa-miR-100-5p  | ID1    | hsa-miR-770-5p  | FOS  |
| hsa-miR-192-5p  | ASPM  | hsa-miR-19b-3p  | CCNA2  | hsa-miR-192-5p  | ID1    | hsa-miR-29a-3p  | FOS  |
| hsa-miR-26b-5p  | ASPM  | hsa-miR-455-3p  | CYP2B6 | hsa-miR-26b-5p  | ID1    | hsa-miR-29c-3p  | FOS  |
| hsa-let-7a-5p   | ASPM  | hsa-miR-363-5p  | CYP2B6 | hsa-let-7b-5p   | THBS1  | hsa-miR-5581-3p | FOS  |
| hsa-miR-218-5p  | ASPM  | hsa-miR-377-5p  | CYP2B6 | hsa-miR-30a-3p  | THBS1  | hsa-miR-224-5p  | FOSB |
| hsa-miR-26b-5p  | FOXMI | hsa-miR-4537    | CYP2B6 | hsa-miR-98-5p   | THBS1  |                 |      |
| hsa-miR-186-5p  | FOXMI | hsa-miR-4532    | CYP2B6 | hsa-let-7a-5p   | THBS1  |                 |      |

---



Figure S1 KEGG mapping analysis diagram of 42 key genes most enriched pathway (p53 signaling pathway)

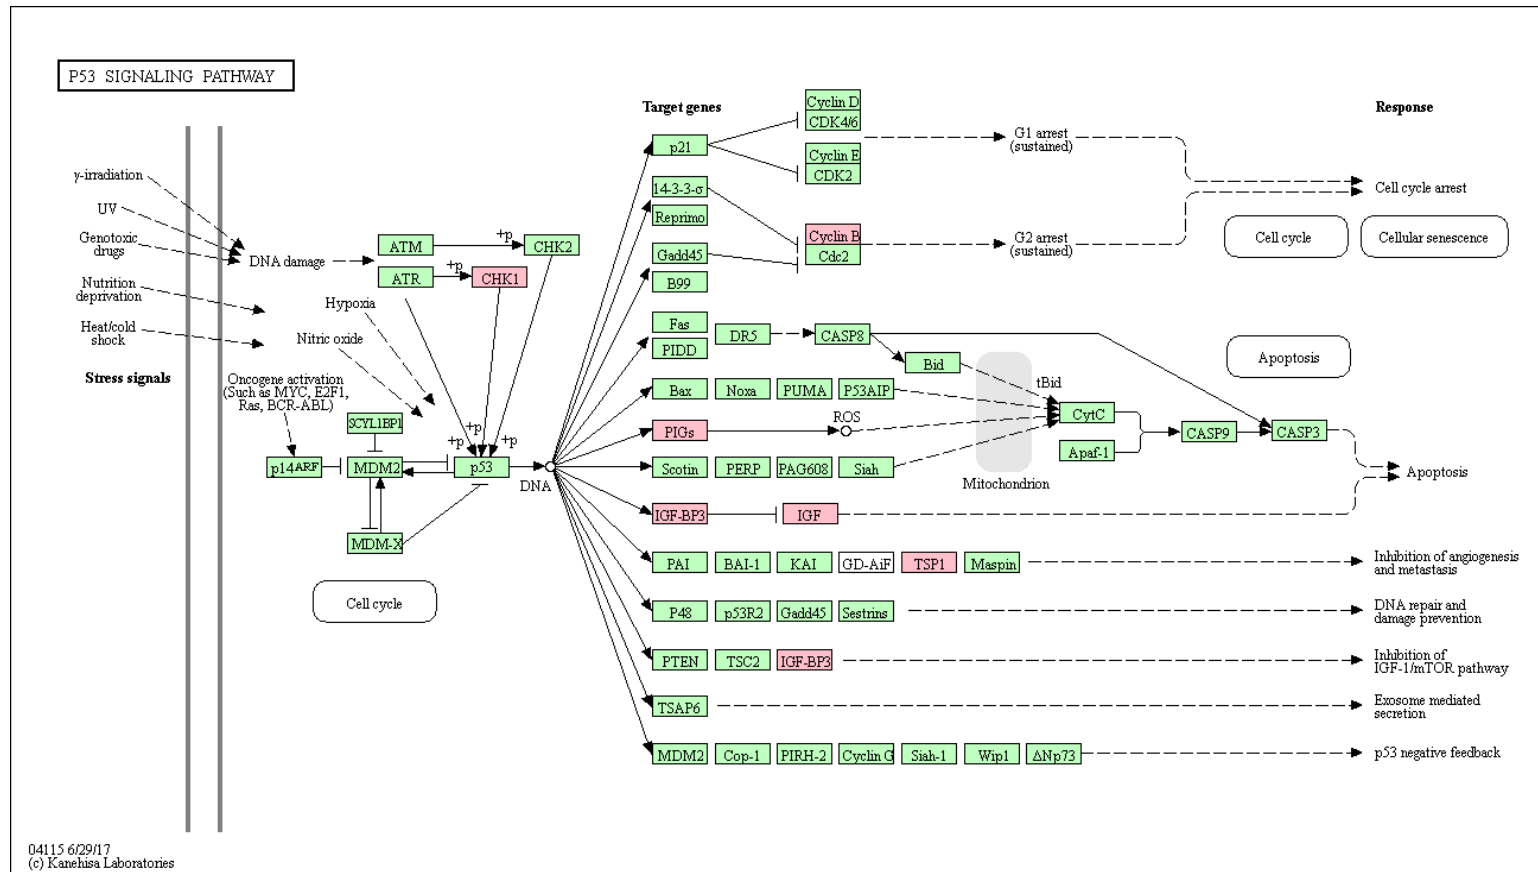

Supplement: f1 [file 1431396.f1.pdf]
